# Population-specific recombination maps from segments of identity by descent

Ying Zhou<sup>1\*</sup>, Brian L. Browning<sup>2</sup>, Sharon R. Browning<sup>1\*</sup>

<sup>1</sup> Department of Biostatistics, University of Washington, Seattle, WA 98195, USA

<sup>2</sup> Division of Medical Genetics, Department of Medicine, University of Washington, Seattle, WA 98195, USA

\* Corresponding authors: Y. Zhou [yz001@uw.edu](mailto:yz001@uw.edu), S. R. Browning [sguy@uw.edu](mailto:sguy@uw.edu)

## 1 ABSTRACT

2 Recombination rates vary significantly across the genome, and estimates of recombination rates are  
3 needed for downstream analyses such as haplotype phasing and genotype imputation. Existing methods  
4 for recombination rate estimation are limited by insufficient amounts of informative genetic data or by  
5 high computational cost. We present a method for using segments of identity by descent to infer  
6 recombination rates. Our method can be applied to sequenced population cohorts to obtain high-  
7 resolution, population-specific recombination maps. We use our method to generate new  
8 recombination maps for European Americans and for African Americans from TOPMed sequence data  
9 from the Framingham Heart Study (1626 unrelated individuals) and the Jackson Heart Study (2046  
10 unrelated individuals). We compare our maps to existing maps using the Pearson correlation between  
11 estimated recombination rates. In Europeans we use the deCODE map, which is based on a very large  
12 set of Icelandic family data (126,407 meioses), as a gold standard against which to compare other maps.  
13 Our European American map has higher accuracy at fine-scale resolution (1-10kb) than linkage  
14 disequilibrium maps from the HapMap and 1000 Genomes projects. Our African American map has  
15 much higher accuracy than an admixture-based map that is derived from a similar number individuals,  
16 and similar accuracy at fine scales (1-10kb) to an admixture-based map that is derived from 15 times as  
17 many individuals.

18

19

## 20 INTRODUCTION

21 Recombination, or crossing-over, of chromosomes is essential for proper chromosome disjunction  
22 during meiosis. Recombination rates vary across the genome, tending to increase with decreasing  
23 chromosome length<sup>1</sup>, increase near the telomeres, particularly in males<sup>2</sup>, increase in regions with high  
24 GC content<sup>2</sup>, and increase in hotspots<sup>3</sup>, many of which are associated with the PRDM9 motif<sup>4</sup>.  
25 Recombination rates differ significantly between female and male meioses<sup>1</sup>, although sex-averaged  
26 maps are suitable for many analyses that involve historical recombination, including estimation of  
27 demographic history<sup>5,6</sup>, estimation of mutation rates<sup>7,8</sup>, estimation of haplotype phase<sup>9-11</sup>, genotype  
28 imputation<sup>12,13</sup>, and inference of local ancestry in admixed genomes<sup>14-16</sup>. Recombination rates also differ  
29 by age<sup>2,17</sup> and by individual<sup>17,18</sup>.

30 There are four primary existing approaches to recombination rate estimation. The first is analysis of  
31 family data<sup>2,17,19,20</sup>. In order to estimate recombination rates at high resolution, extremely large numbers  
32 of meioses are required. One of the largest sources of such meioses is the deCODE Icelandic data<sup>2</sup>.  
33 Advantages of the family-based approach are that it can estimate sex-specific rates, and that it allows  
34 investigation of individual-specific factors influencing recombination rates<sup>2,17</sup>. A disadvantage is that the  
35 large family databases required by this approach are rare, so population-specific rates are not available  
36 for most populations.

37 A second approach is sperm-typing, with recombination events identified by comparing haplotypes  
38 between sperm cells obtained from the same individual. This approach can be used to locate  
39 recombination hotspots<sup>21,22</sup> and construct individual genome-wide recombination maps in males<sup>23</sup>.  
40 However, this approach has not been used to construct population-level recombination maps because it  
41 is not applicable to females, and because large databases of whole-genome sperm sequence are not  
42 available.

43 A third approach uses admixed genomes such as those from African Americans<sup>24,25</sup>. The local ancestry  
44 (i.e., continental origin of the genetic material at each point in the genome) is inferred, and positions of  
45 change in local ancestry are positions at which post-admixture recombination has occurred. This  
46 approach can use data from unrelated individuals, and each individual provides information from many  
47 meioses. One limitation of this approach is that it is only applicable to admixed populations. Another  
48 disadvantage is that it relies on local ancestry calls which can be inaccurate in some cases<sup>26,27</sup>.

49 A final approach uses linkage disequilibrium (LD) between loci<sup>28-32</sup>. Correlations between nearby alleles  
50 are broken down over many generations due to recombination, and thus there is a close relationship  
51 between LD and recombination rate. An advantage of LD-based estimation is that it is based on very  
52 large numbers of meioses, reaching far back into the past. However, if recombination rates have  
53 changed over time, the estimates will be averages across time rather than reflecting current rates, which  
54 may be a disadvantage for applications such as local ancestry inference that are based on recombination  
55 in recent generations. LD-based estimation is computationally challenging, and is also biased if an  
56 incorrect demographic history is assumed<sup>31,32</sup>.

57 We present a new approach based on estimated segments of identity by descent (IBD) in population  
58 samples. IBD segment ends represent points at which past recombination has occurred. Since the IBD  
59 segments result from shared ancestry in the past several hundred generations, the estimates of  
60 recombination rates reflect recent rates while incorporating information from a large number of  
61 meioses. Our approach is computationally efficient so that it can be applied to samples of thousands of  
62 individuals, resulting in highly precise estimates. When applied to samples from distinct populations, our  
63 approach provides population-specific rates of recombination.

64

## 65 RESULTS

### 66 Method overview

67 IBD segment endpoints are positions of past recombination events. The density of endpoints of IBD  
68 segments originating from common ancestors more recent than a reference time point is thus  
69 proportional to the recombination rate. We use this relationship to estimate relative recombination  
70 rates based on the endpoints of IBD segments.

71 There are two main challenges that must be addressed: inaccurate estimation of IBD endpoints and the  
72 unknown time to the most recent common ancestor. Because of genotype error and phasing error, IBD  
73 segment endpoints can be incorrectly determined. In our method, we apply a gap-filling strategy to  
74 address inaccurate IBD endpoints. When two or more IBD segments from the same pair of individuals  
75 are separated by only a small gap, and the gap contains very few (at most one for the analyses  
76 presented here) discordant homozygous genotypes, we merge the segments into a single segment<sup>33</sup>.  
77 This strategy is very efficient at removing incorrect IBD endpoints, even in the presence of significant  
78 genotype error (see simulation results below).

79 In addition, when we detect an IBD segment, we don't generally know the number of generations to the  
80 most recent common ancestor, and in some regions we may detect IBD segments due to more distant  
81 ancestry, leading to higher rates of detected IBD segments in those regions. If the genetic lengths of the  
82 segments were known, we could filter the IBD segments by genetic length, as a proxy for age, and thus  
83 obtain uniform rates of detected segments across the genome. When the true genetic map is unknown,  
84 the genetic lengths of the segments cannot be used as a filtering criteria, and we use physical lengths  
85 instead. However, the distribution of IBD segments of a given physical length varies greatly. Regions  
86 with lower recombination rate will have more segments exceeding a physical length threshold than

87 regions with higher recombination rate. If this difference is not considered, recombination rate will be  
88 overestimated in low-recombination regions and underestimated in high-recombination regions.

89 In order to address the issue of uneven IBD coverage, we use an iterative approach. Given the current  
90 estimate of recombination rates across the chromosome (the initial estimate has a constant rate of  
91 recombination), we obtain estimated genetic lengths of all IBD segments. We then selectively remove  
92 shorter segments in regions with higher rates of IBD segments until IBD coverage across the  
93 chromosome is approximately equal. To achieve this coverage equalization, we first divide the  
94 chromosome into intervals of equal physical length, and place within each interval the IBD segments  
95 that cover all or part of the interval. We determine the smallest number of IBD segments in any interval,  
96 and we remove the shortest (in estimated genetic length) IBD segments from each interval to reduce  
97 the number of segments in the interval to that smallest number. After this procedure, each interval  
98 contains the same number of IBD segments (Figure 1). After the coverage equalization, we count the  
99 remaining IBD endpoints within each interval to estimate the relative recombination rate for the  
100 interval. We repeat the procedure using the updated estimates of recombination rate. We find that 20  
101 iterations suffices for accurate estimation.

## 102 Validation by simulations

103 To evaluate whether our method produces unbiased estimates of recombination rate, we simulated  
104 data using a podium-like recombination map (Figure S1) and added genotype error (Methods). When  
105 the genotype error rate is low (0.01-0.1%), the average across 100 replicates of the estimated  
106 recombination rate matches the true recombination rate; when the genotype error rate is 0.5%, some  
107 bias is observed. With high quality sequence data, the genotype error rate for SNPs passing quality  
108 control filters is around 0.02%<sup>34</sup>. Our estimates are slightly inflated at the chromosome ends. This is  
109 because genotype error near the chromosome ends result in partial IBD segments that are too short to

110 be detected and merged with other partial IBD segments by our gap-filling process. In our tests, the  
111 region with inflated recombination rates is generally shorter than 1Mb when the genotype error is  
112  $\leq 0.1\%$ . We recommend that normalization of relative recombination rates using an external map be  
113 calculated using the central portion of the chromosome, excluding 1 Mb on each end.

114 We also used simulation to evaluate the precision of our method, first assessing the impact of sample  
115 size and resolution. The resolution, which we refer to as “scale” is the size of the intervals in which  
116 recombination rate is estimated. For example, with a 10 kb scale, the recombination rate is estimated in  
117 intervals of size 10 kb, and the resulting map has genetic positions at grid points that are 10 kb apart.  
118 We simulated 250 individuals, 500 individuals, and 1000 individuals under a Wright-Fisher model with  
119 constant effective population size ( $N_e = 10000$ ). The recombination map used for this simulation is the  
120 Hapmap II combined LD map on chromosome 1:10 Mb-110 Mb.<sup>35</sup> Pearson correlation coefficients  
121 between the estimated rates and the true rates across intervals increase for larger interval sizes and  
122 larger sample sizes (Figure 2). For the largest sample size, we obtain correlation coefficients over 0.9 for  
123 resolutions of 10 kb or greater and genotype error rates  $\leq 0.1\%$ . With smaller sample sizes, we obtain  
124 correlation coefficients over 0.9 for resolutions of 50 kb or greater and genotype error rates  $\leq 0.1\%$ .

#### 125 Comparison with admixture-based recombination rate estimation

126 We simulated genotype data from an admixed African American demographic model<sup>33</sup> in order to  
127 compare our IBD-based approach with RASPBerry<sup>25</sup>, an admixture-based approach. We simulated 2500  
128 admixed individuals and 100 individuals from each reference population (representing European  
129 ancestry and African ancestry). RASPBerry uses the reference individuals to call local ancestry in the  
130 admixed individuals. Because RASPBerry is computationally intensive, we simulated a 20 Mb region  
131 rather than 100 Mb. The recombination map in the simulation is the HapMap II combined LD map,  
132 chr1:10 Mb-30 Mb.<sup>35</sup> We added genotype errors to the admixed and reference individuals and phased

133 the data with Beagle 5.0 (Methods) before running the analyses. Our IBD-based method was applied to  
134 the admixed data only.

135 RASPBerry uses the HapMix algorithm for ancestry inference, which analyzes each admixed individual  
136 independently and allows for parallelized computation over admixed individuals<sup>15,25</sup>. To reduce  
137 RASPBerry's wallclock compute time, we divided the 2500 admixed individuals into 250 sets of 10  
138 individuals. We analyzed the data using a compute server with two 6-core Intel Xeon E5-2630 2.6 GHz  
139 processors and 128 GB memory running CentOS Linux. RASPBerry required 20.1 cpu hours on average  
140 to estimate the ancestry switches for each set of 10 individuals. For comparison, our method required  
141 11.1 cpu hours (1.0 hour of wall clock time, multi-threaded) to call the IBD segments, fill IBD gaps, and  
142 estimate the recombination map for the whole set of 2500 admixed individuals.

143 In assessing the accuracy of the estimates, we trimmed 5 Mb from each end of the simulated region  
144 (Figure 3) before computing the Pearson correlation coefficient with the true recombination rates,  
145 because accuracy is reduced near chromosome ends (results without this trim are shown in Figure S2).  
146 Estimates from our IBD-based method (IBDRecomb) have higher correlation with the true  
147 recombination rates than RASPBerry at all scales. At a 10kb scale, our method's estimates have a  
148 correlation coefficient around 0.9, while RASPBerry's correlation coefficient is around 0.65 (Figure 3). A  
149 likely explanation for the higher accuracy of our method is that our method utilizes recombination  
150 events before and after admixture, while RASPBerry can only use recombination events that occurred  
151 after admixture.

152 Constructing a fine scale recombination map for the Framingham Heart Study data

153 We refer to the recombination rates that we estimated from the TOPMed Framingham Heart Study data  
154 as the FHS map. We compare the FHS map to other existing recombination maps, including the deCODE  
155 map based on Icelandic pedigrees<sup>2</sup>, the LD-based combined map from Hapmap II<sup>35</sup>, and LD-based maps



156 from the 1000 Genomes Project<sup>36</sup>. Since most of these existing maps are available in the Genome  
157 Reference Consortium Human Build 37 (GRCh 37), we lifted over the deCODE map from build 38 to build  
158 37, removing intervals not conserved between two genome builds (Methods).

159 Examination of a region on chromosome 1 shows that our FHS map captures the same hotspots that are  
160 found with other methods (Figure 4). For a genome-wide comparison, we calculate correlation  
161 coefficients between maps. We regard the deCODE map as the “gold standard” in our comparison of  
162 recombination maps estimated from Europeans, because this European-specific map is based on directly  
163 observed recombination events from a very large number of meioses. We calculate the Pearson  
164 correlation coefficient between a map’s recombination rate estimates and the deCODE map’s rates. In  
165 order to calculate the correlation coefficient at a given scale (such as 1kb), we divide the genome into  
166 intervals of this length, and obtain the estimated recombination rate for each such interval for every  
167 compared map. Since each map covers a slightly different subset of the genome, we ignore intervals  
168 that are not fully covered by all maps included within a given comparison. We excluded Bhérier et al’s  
169 refined maps<sup>19</sup> from the comparison because Bhérier et al used the deCODE recombination events in  
170 their estimation. We find that all the European-ancestry maps have similar correlation coefficients to  
171 the deCODE map at scales ranging from 50 kb to 500 kb, while our FHS map has the highest correlation  
172 coefficients at scales ranging from 1kb to 10kb (Figure 5). Our map has higher correlation coefficients  
173 than the European LD-based maps at fine scales, indicating that our method can provide superior  
174 recombination rate estimation over LD-based methods.

175 Constructing a fine scale recombination map for the Jackson Heart Study data

176 We also used our method to construct a recombination map for African Americans based on the data  
177 from the TOPMed Jackson Heart Study data. We compare our map (the JHS map) with three other maps  
178 constructed with African American data: the AA map<sup>24</sup>, the AfAdm map<sup>25</sup>, and the 1000 Genomes LD-

179 based map for the ASW (Americans of African ancestry in SW USA) population<sup>36</sup>. The AA and AfAdm  
180 maps are constructed using counts of ancestry switches in 30,000 and 2864 admixed African Americans,  
181 respectively. We also compare to a 20%:80% weighted average of the 1000 Genomes LD-based maps for  
182 CEU (Utah residents with northern and western European ancestry) and YRI (Yoruba in Ibadan, Nigeria).

183 Again examining a region on chromosome 1, we find that our JHS map includes the same recombination  
184 hotspots found by other LD-based and admixture-based methods (Figure S3). For a genome-wide  
185 comparison, we calculate correlation coefficients between maps. The AA map, the JHS map, the LD-  
186 based ASW map, and the weighted CEU+YRI map are highly correlated at large scales (Pearson  
187 correlation coefficients  $> 0.85$  at scales  $\geq 50\text{kb}$ ), and slightly different at fine scales (Table 1, Table S1). At  
188 scales ranging from 1kb to 10kb, the CEU+YRI map has the best performance with highest correlation  
189 coefficients to each other map (Table S1). It is even better than the ASW map which is inferred from an  
190 African American population, possibly because populations in the Americas experienced founding  
191 bottlenecks<sup>33</sup> which reduce the number of unique historical recombination events represented in  
192 current-day genomes from these populations.

193 At fine scales (1-10kb), the JHS map and the admixture-based AA map have similar correlation with  
194 other maps, while at large scales (50-500kb) the AA map has higher correlation (Table 1, Table S1).  
195 Since the AA map is based on SNP array data, it is not surprising that it has lower relative accuracy at  
196 fine scales, while its large sample size (around 15 times as many individuals as in our JHS analysis) gives  
197 it high accuracy at large scales. Both the JHS map and the AA map have much higher correlations than  
198 the admixture-based AfAdm map to other maps at all scales. The AfAdm map is based on data with a  
199 sample size that is similar to that of our JHS data (2864 individuals for the AfAdm map and 2046  
200 individuals for our JHS map). Hence it is notable that our JHS map has much better accuracy than the  
201 AfAdm map.

## 202 DISCUSSION

203 We have presented the first IBD-based recombination rate estimation method, along with estimates of  
204 recombination rates in European Americans and African Americans. Our approach and maps have  
205 significant advantages over existing approaches and maps. Our approach is applicable to large  
206 population-based samples with sequence data, enabling the generation of high-resolution population-  
207 specific recombination maps. Our maps constructed from the Framingham Heart Study and the Jackson  
208 Heart Study will be useful for downstream analyses that require recombination maps, including  
209 haplotype phase estimation, genotype imputation, inference of demographic history, and inference of  
210 local ancestry in admixed individuals.

211 As with other indirect methods (admixture-based or LD-based estimation), our method requires the  
212 total genetic length of chromosomes from direct (family-based) estimation in order to convert relative  
213 recombination rates to absolute recombination rates. While family-based estimation of high-resolution  
214 genetic maps requires very large numbers of informative meioses, obtaining the approximate genetic  
215 length of a chromosome requires many fewer meioses. In addition, while recombination rates may  
216 change at small scales due to changes in hotspots, large-scale rates are conserved across populations<sup>37</sup>.  
217 Thus chromosome lengths from the Icelandic deCODE map (for example) may be used to normalize IBD-  
218 based relative recombination rates estimated in other human populations.

219 Generation of new maps with our method is straightforward, and we provide software to do so (Online  
220 Resources). Our method is applicable to humans and to other diploid species. With reductions in  
221 sequencing costs, it is likely that there will soon be suitable data for a variety of species, including model  
222 organisms, domesticated species, and wild species. The generation of high-resolution maps will facilitate  
223 other analyses in these populations. As input, our method requires high-quality genotype data (variant  
224 calls) on at least several hundred individuals, and a high-quality genome build for determination of

225 physical positions. Sequence data is needed for accurate fine-scale estimation, but array data is  
226 adequate for estimation at large scales (Figure S4).

227 Our IBD-based method gives greater resolution than ancestry-switch based methods for constructing  
228 recombination maps from admixed individuals. This is because our method can detect recombination  
229 events that occurred before admixture, as well as those that occurred after admixture, while ancestry-  
230 switch based methods only use recombination between different ancestry segments that occurred after  
231 admixture. We built an African American recombination map with 2,046 unrelated African American  
232 individuals from the TopMED Jackson Heart Study data, which had significantly better accuracy than the  
233 admixture-based map constructed on 2,864 unrelated African American and Afro-Caribbean individuals,  
234 and similar accuracy at fine scales to an ancestry-switch based map constructed from 15 times as many  
235 samples ( $n = 30,000$ ).

236 We also built a recombination map using data from the TopMED Framingham Heart Study data  
237 ( $n=1626$ ), which represents a European-American population. This map shows better accuracy at fine  
238 scales (1-10 kb) than the LD-based maps for the 1000 Genomes Project European populations. Like our  
239 method, LD-based methods are based on past recombination events, however our method depends on  
240 recent recombination events, while LD-based methods are primarily based on recombination events  
241 occurring in the much more distance past. In contrast, family-based methods use recombination events  
242 from the past few generations. Recombination rates evolve over time<sup>38</sup>, so restricting the analysis to  
243 more recent events is advantageous for some applications.

244 Current recombination rates in Europeans and other out-of-Africa populations may differ from rates in  
245 African populations because of drift that occurred in the out-of-Africa bottleneck. For example, non-  
246 African populations predominantly carry the A allele of PRMD9, while African populations carry that  
247 allele at a frequency of only around 50%<sup>4</sup>. Thus LD-based recombination rates, which are based on older

248 recombination events, may be more appropriate for African populations than for out-of-Africa  
249 populations. Indeed, while the LD-based maps for the 1000 Genomes European populations had inferior  
250 accuracy to our IBD-based map, LD-based maps from the 1000 Genomes African populations (the ASW  
251 map and the weighted CEU+YRI map) provided slightly superior accuracy to our IBD-based map. With  
252 larger sample sizes, we anticipate that our IBD-based approach could provide better maps than the LD  
253 approach, which is limited by computational cost to relatively small sample sizes.

254 The IBD-based approach has some limitations. The major obstacle to achieving higher accuracy at fine  
255 scales for our method is the difficulty in accurately establishing the exact IBD endpoints. Wrongly placed  
256 IBD endpoints may lead to false recombination rate peaks at fine scales and may also lead to  
257 underestimation in recombination hotspots. Currently, IBD estimation methods do not provide a  
258 representation of the uncertainty around the exact IBD endpoints. Future work could address this issue.

## 259 METHODS

### 260 Data processing

261 We used a coalescent-based simulator, msprime<sup>39</sup>, to simulate genetic data under different scenarios.  
262 We removed the phase information from the simulated haplotypes and added genotype error. Given a  
263 genotype error rate  $\epsilon$ , and considering each genotype in turn, we added an error to the genotype with  
264 probability  $\epsilon$ . When adding an error to a genotype, we selected one of the genotype's two alleles at  
265 random, and changed that allele to its alternative form (all simulated markers are biallelic). Then we  
266 filtered sites to keep those with minor allele frequency larger than 0.05, and phased the data with  
267 Beagle 5.0<sup>9,13</sup> (version 04Jun18.a80).

268 We applied our method to TOPMed whole genome sequence data from the Framingham Heart Study  
269 (FHS, download from dbGaP, phs000974.v2.p2), and the Jackson Heart Study (JHS, downloaded from

270 dbGaP, phs000964.v2.p1). The individuals in the FHS data are European Americans, while the individuals  
271 in the JHS data are African Americans. To control genotype error, we only used biallelic SNPs passing all  
272 quality filters and with minor allele frequency larger than 0.05. We used Beagle 5.0<sup>9,13</sup> (version  
273 04Jun18.a80) to infer haplotype phase for each data set. We then used King v2.2.2<sup>40,41</sup> to select  
274 unrelated individuals separated by at least two degrees of relatedness. After filtering, we have 1626  
275 unrelated individuals in the FHS data and 2046 unrelated individuals in the JHS data. The purpose of  
276 removing relatives is to improve computational efficiency. Accuracy is unchanged when relatives are  
277 included (data not shown).

278 When phasing haplotypes, detecting IBD segments, and gap-filling IBD segments, we used a 1cM/Mb  
279 recombination rate. The IBD segments for our method were obtained by applying Refined IBD<sup>42</sup> (LOD  
280 threshold = 1, minimum length 300kb) with gap-filling (maximum gap distance = 500kb, maximum  
281 number of discordant sites = 1). The thresholds (LOD 1 and minimum length 300kb) used in Refined IBD  
282 are quite low. However, in conjunction with the gap-fill step they allow the procedure to find as much  
283 IBD as possible, some of which will have a large genetic length and hence pass the subsequent filtering  
284 for IBD coverage (see the next section). The low thresholds used with Refined IBD will result in some  
285 short reported IBD segments that are actually the conflation of several shorter IBD segments<sup>43</sup>.  
286 However, for the purpose of estimating the genetic map, the benefit of the increased number of IBD  
287 segments is greater than the additional noise due to some IBD segment conflation. Use of a larger  
288 minimum physical length for IBD segments results in loss of accuracy (Figure S5).

289 The estimated recombination maps are normalized by the genetic length of each chromosome from the  
290 deCODE map, or by the true total genetic length for the simulated data. For comparison with our maps,  
291 we lifted over the AA map and the AfAdm map from build 36 to build 37 and the deCODE map from  
292 build 38 to build 37 using the following strategy. First we converted the target map to the bed interval  
293 and rate format, as “chr#:from-to rate”. Then we lifted over using the UCSC online tool:

294 <https://genome.ucsc.edu/cgi-bin/hgLiftOver>, outputting the interval positions in bed format. We  
295 removed intervals that failed to be converted or for which the interval length changed by more than 1%.  
296 In total 133.7Mb was removed from the deCODE map, 139.6Mb was removed from the AA map, and  
297 283.8Mb was removed from AfAdm map. Finally we mapped the recombination rates from each original  
298 map to the remaining intervals in build 37.

### 299 Counting IBD ends to estimate recombination rates

300 One major issue in using IBD segments to estimate recombination rates is that IBD segments of a given  
301 physical length are not evenly distributed along the target genome when the recombination rates vary.  
302 To deal with this issue, we use a coverage threshold to make sure that the IBD endpoints for each  
303 interval use IBD segments drawn from equivalent distributions.

304 The IBD coverage of an interval (a genomic region of specified physical length) is the number of IBD  
305 segments covering the interval. IBD segments that partially cover the interval contribute a fractional  
306 value to the coverage equal to the proportion of the interval covered. The coverage is calculated for  
307 each interval, and the minimal value is determined. Then, in each interval, the segments with shortest  
308 genetic length are removed until removing an additional segment from the interval would reduce the  
309 coverage below this minimal level. An IBD segment may be removed from one interval but retained in  
310 another.

311 We use a constant recombination rate (1cM/Mb) to initiate the iterative estimation procedure. In each  
312 iteration, we re-estimate the genetic lengths of the IBD segments using the current recombination map,  
313 and we re-apply the coverage threshold. We then update the recombination rates for each interval  
314 based on the number of IBD endpoints located in the interval:

$$315 \quad R_i = \frac{X_i}{\sum X_j} \frac{L}{B} \quad (\text{Equation 1})$$

316 For the  $i$ -th interval,  $R_i$  is the estimated recombination rate,  $X_i$  is the number of IBD segment endpoints  
317 in the interval,  $L$  is the genetic length of the chromosome, and  $B$  is the physical length of the interval  
318 (the same for each interval). The genetic length of the chromosome is obtained from an external source  
319 such as a family-based genetic map.

320 In order to improve convergence, we use the average of the two previous estimates as the input  
321 recombination map to the next iteration (starting with the third iteration). Without this averaging, we  
322 found that the correlation between the true and simulated map oscillated up and down between  
323 successive iterations (Figure S6).

#### 324 [Estimation at chromosome ends](#)

325 We need to treat the ends of the chromosome differently, because IBD segments cannot continue  
326 beyond the end of the chromosome. Thus IBD segments starting or ending at a chromosome end are  
327 shorter on average, and fewer of these IBD segments will be detected. This results in a lack of right ends  
328 of IBD segments in intervals near the left end of the chromosome, and of left ends of IBD segments near  
329 the right end of the chromosome.

330 When estimating the recombination rate in an interval near the chromosome end, we make several  
331 changes to the algorithm described above. In order to describe these changes, we define chromosome  
332 end regions, and their neighboring adjunct regions (Figure 6). The end region starts at the chromosome  
333 end and has genetic length equal to the median genetic length of all IBD segments that extend to that  
334 chromosome end, plus any additional length required in order to have the end of this region correspond  
335 to a breakpoint between intervals. The remaining region between the two ending regions is the mid  
336 region. The adjunct region corresponding to an end region immediately follows the end region (on the  
337 side towards the middle of the chromosome) and has the same physical length as the end-region. During  
338 this procedure, we are not estimating the recombination rates of the intervals in the adjunct region.



339 Rates in this region are estimated using the unmodified procedure described earlier. In what follows, we  
340 describe the changes to the algorithm with respect to the left end of the chromosome; the right end is  
341 analogous.

342 The first change is that we count only the left ends of the IBD segments, rather than both endpoints of  
343 the IBD segments. This is because there will be a relative lack of right ends of IBD segments near the left  
344 chromosome end because many IBD segments that are censored by the left chromosome end will not  
345 be detected. In contrast, there will be no reduction in left ends of IBD segments close to the end of the  
346 chromosome.

347 The second change is that we need to modify the application of the IBD coverage threshold so that it has  
348 equal effect in all intervals in the end region, regardless of how close they are to the chromosome end.  
349 The left chromosome end left-censors the IBD segments that reach that chromosome end, so the visible  
350 lengths of the segments are shorter than they would otherwise be. For intervals other than the left-most  
351 one, we can mimic this censoring by removing those parts of IBD segments that fall beyond the left  
352 boundary of the interval. This trimming reduces the lengths of the IBD segments, and is performed only  
353 with respect to a given interval. The part of an IBD segment that is trimmed off when calculating  
354 segment lengths for one interval may be retained when calculating lengths for another interval. Thus,  
355 for each interval, not only for the left-most interval, the IBD segments that intersect the interval are left-  
356 censored by the left side of the interval. These adjusted IBD lengths are used when excluding the  
357 shortest IBD segments to equalize IBD coverage in each interval.

358 Recombination rates calculated with our method are relative. We use a user-specified total  
359 chromosome genetic length to normalize them. Since the estimation procedure for the end region and  
360 the mid region differ, we must put the two sets of results on the same scale. We do this by applying the  
361 end-region procedure for censoring IBD segments and equalizing IBD segment coverage to the adjunct

362 region. Since we also have IBD end counts from the mid-region procedure for the adjunct region, we  
363 normalize the results from IBD end point counts for the end region by multiplying by the ratio of the IBD  
364 end counts in the adjunct region obtained from the mid-region and end-region methods.

365 Thus for intervals in the end region we obtain an estimate of what the two-sided end count would be if  
366 the interval was not affected by the chromosome end censoring:

$$367 \quad \hat{X}_i^E = Y_i^E \frac{\sum X_j^A}{\sum Y_j^A}$$

368 where  $Y_i^E$  is the left-sided IBD end count for interval  $i$  in the left end-region;  $\sum Y_j^A$  is the total count of  
369 left-sided IBD ends for intervals in the adjunct region, applying the end-region algorithm described in  
370 this section; and  $\sum X_j^A$  is the total count of IBD ends (left and right) for intervals in the adjunct region,  
371 based on the original (mid-region) algorithm. The value  $\hat{X}_i^E$  is the adjusted end count for interval  $i$  in the  
372 end-region; this is used in place of  $X_i$  in the recombination rate estimation formula (Equation 1).

### 373 Fine-scale estimation

374 We have proposed a procedure for estimating recombination rates from IBD endpoints in the previous  
375 two sections. This procedure works well when the number of detected IBD segments is large due to a  
376 large sample size, and the interval size is large. However, when the interval size decreases for fine-scale  
377 estimation, the coverage threshold tends to decrease, resulting in loss of information at small sample  
378 sizes. We thus improve fine scale estimation by running our algorithm in two steps. First, we construct a  
379 recombination map at a large scale, for example with an interval size of 500kb (which we use as the at  
380 the first step scale in all the analyses in this paper). We obtain estimates of genetic length for each large  
381 interval, and we fix these large-scale lengths in the second step. In the second step, we divide each large  
382 interval into many smaller sub-intervals at the desired scale. For example, if results at a 10 kb scale are

383 desired, sub-intervals of length 10 kb are used. The estimation procedure for these short intervals is  
384 slightly modified from the algorithm described above.

385 For the fine-scale estimation, the IBD coverage threshold is based on the minimal coverage of the sub-  
386 intervals within a large interval, rather than on the minimal coverage of intervals across the whole  
387 chromosome. The local coverage threshold tends to be larger than the global threshold used in the  
388 large-scale estimation because there is typically less variability in recombination rate across an interval  
389 than across a whole chromosome.

390 After the large-scale estimation, the lengths of the large intervals in the end region are known and it is  
391 no longer necessary to use an adjunct region to normalize lengths in the end region. However, we do  
392 still need to use only the one-sided IBD end counts, and to censor the IBD segments intersecting each  
393 interval when applying the IBD coverage threshold in the end region. As in the large-scale step, we  
394 adjust the genetic lengths by trimming off that part of the IBD segment that extends beyond the sub-  
395 interval in the direction of the nearby chromosome end.

396 Within each large interval (whether within an end region or not), we estimate the recombination rates  
397 of the sub-intervals using the formula in Equation 1, using the previously calculated genetic length of the  
398 large interval as the region length  $L$ . For intervals that are not in the end regions, we use two-sided IBD  
399 end counts for the  $X_i$ , while for intervals within the two end regions, we replace these with the one-  
400 sided IBD end counts.

401 We have implemented this two-step procedure in the IBDrecomb program, and the fine scale estimation  
402 step is automatically applied when the fine interval size parameter (for the second stage of estimation)  
403 is set to a value that is smaller than the large interval size parameter (for the first stage of estimation;  
404 500kb by default).

405

## 406 Online Resources

407 IBDrecomb (including FHS and JHS maps): <https://github.com/YingZhou001/IBDrecomb>

408 Msprime: <https://msprime.readthedocs.io/en/stable>

409 Refined IBD and Gap-filling tool: <http://faculty.washington.edu/browning/refined-ibd.html>

410 AA map (build 36): <http://www.well.ox.ac.uk/~anjali/AAmap/aamap.tar.gz>

411 AfAdm map (build 36):

412 [https://www.eeb.ucla.edu/Faculty/Novembre/software/AfricanAmerican\\_AfricanCaribbean\\_recombination\\_maps.zip](https://www.eeb.ucla.edu/Faculty/Novembre/software/AfricanAmerican_AfricanCaribbean_recombination_maps.zip)

414 deCODE map (build 38):

415 [https://science.sciencemag.org/highwire/filestream/721792/field\\_highwire\\_adjunct\\_files/4/aau1043\\_D\\_ataS3.gz](https://science.sciencemag.org/highwire/filestream/721792/field_highwire_adjunct_files/4/aau1043_D_ataS3.gz)

417 Hapmap II combined map (build 37): [ftp://ftp.ncbi.nlm.nih.gov/hapmap/recombination/2011-01\\_phaseII\\_B37/genetic\\_map\\_HapMapII\\_GRCh37.tar.gz](ftp://ftp.ncbi.nlm.nih.gov/hapmap/recombination/2011-01_phaseII_B37/genetic_map_HapMapII_GRCh37.tar.gz)

419 1000 genome maps (build 37):

420 [ftp://ftp.1000genomes.ebi.ac.uk/vol1/ftp/technical/working/20130507\\_omni\\_recombination\\_rates/](ftp://ftp.1000genomes.ebi.ac.uk/vol1/ftp/technical/working/20130507_omni_recombination_rates/)

421 Bhérier et al's refined maps (build 37):

422 [https://github.com/cbherer/Bherer\\_etal\\_SexualDimorphismRecombination/raw/master](https://github.com/cbherer/Bherer_etal_SexualDimorphismRecombination/raw/master)

423

## 424 ACKNOWLEDGMENTS

425 This work was supported by NIH grant R01HG005701. Whole genome sequencing (WGS) for the Trans-  
426 Omics in Precision Medicine (TOPMed) program was supported by the National Heart, Lung and Blood  
427 Institute (NHLBI). WGS for "NHLBI TOPMed: Whole Genome Sequencing and Related Phenotypes in the

428 Framingham Heart Study” (phs000974.v2.p2) was performed at the Broad Institute of MIT and Harvard  
429 (HHSN268201500014C). WGS for “NHLBI TOPMed: The Jackson Heart Study” (phs000964.v2.p1) was  
430 performed at the University of Washington Northwest Genomics Center (HHSN268201100037C).  
431 Centralized read mapping and genotype calling, along with variant quality metrics and filtering were  
432 provided by the TOPMed Informatics Research Center (3R01HL-117626-02S1). Phenotype  
433 harmonization, data management, sample-identity QC, and general study coordination, were provided  
434 by the TOPMed Data Coordinating Center (3R01HL-120393-02S1). We gratefully acknowledge the  
435 studies and participants who provided biological samples and data for TOPMed. The Jackson Heart Study  
436 (JHS) is supported and conducted in collaboration with Jackson State University (HHSN268201800013I),  
437 Tougaloo College (HHSN268201800014I), the Mississippi State Department of Health  
438 (HHSN268201800015I/HHSN26800001) and the University of Mississippi Medical Center  
439 (HHSN268201800010I, HHSN268201800011I and HHSN268201800012I) contracts from the National  
440 Heart, Lung, and Blood Institute (NHLBI) and the National Institute for Minority Health and Health  
441 Disparities (NIMHD). The Framingham Heart Study is conducted and supported by the National Heart,  
442 Lung, and Blood Institute (NHLBI) in collaboration with Boston University (Contract No. N01-HC-25195  
443 and HHSN268201500001I). This manuscript was not prepared in collaboration with investigators of the  
444 Framingham Heart Study or the Jackson Heart Study and does not necessarily reflect the opinions or  
445 views of these studies or of the NHLBI.

446

## 447 AUTHOR CONTRIBUTIONS

448 Y.Z. conceived the study, developed methodology and software, performed analyses, and co-wrote the  
449 paper. B.L.B. provided input into the methodology and edited the paper. S.R.B. supervised the study,  
450 provided input into the methodology, and co-wrote the paper.

451

## REFERENCES

1. Kong, A. *et al.* A high-resolution recombination map of the human genome. *Nature Genetics* **31**, 241--247 (2002).
2. Halldorsson, B.V. *et al.* Characterizing mutagenic effects of recombination through a sequence-level genetic map. *Science* **363**, eaau1043 (2019).
3. Myers, S., Bottolo, L., Freeman, C., McVean, G. & Donnelly, P. A Fine-Scale Map of Recombination Rates and Hotspots Across the Human Genome. *Science* **321**, 321--324 (2013).
4. Paigen, K. & Petkov, P.M. PRDM9 and Its Role in Genetic Recombination. *Trends in Genetics* **34**, 291--300 (2018).
5. Palamara, P.F., Lencz, T., Darvasi, A. & Pe'er, I. Length distributions of identity by descent reveal fine-scale demographic history. *American Journal of Human Genetics* **91**, 809--822 (2012).
6. Browning, S.R. & Browning, B.L. Accurate Non-parametric Estimation of Recent Effective Population Size from Segments of Identity by Descent. *American Journal of Human Genetics* **97**, 404--418 (2015).
7. Palamara, P.F. *et al.* Leveraging Distant Relatedness to Quantify Human Mutation and Gene-Conversion Rates. *American Journal of Human Genetics* **97**, 775--789 (2015).
8. Lipson, M. *et al.* Calibrating the Human Mutation Rate via Ancestral Recombination Density in Diploid Genomes. *PLoS Genetics* **11**, 1--25 (2015).
9. Browning, S.R. & Browning, B.L. Rapid and Accurate Haplotype Phasing and Missing-Data Inference for Whole-Genome Association Studies By Use of Localized Haplotype Clustering. *The American Journal of Human Genetics* **81**, 1084--1097 (2007).
10. O'Connell, J. *et al.* A General Approach for Haplotype Phasing across the Full Spectrum of Relatedness. *PLoS Genetics* **10**, e1004234 (2014).

11. Loh, P.R. *et al.* Reference-based phasing using the Haplotype Reference Consortium panel. *Nature Genetics* **48**, 1443--1448 (2016).
12. Howie, B.N., Donnelly, P. & Marchini, J. A flexible and accurate genotype imputation method for the next generation of genome-wide association studies. *PLoS Genetics* **5**, e1000529 (2009).
13. Browning, B.L., Zhou, Y. & Browning, S.R. A One-Penny Imputed Genome from Next-Generation Reference Panels. *American Journal of Human Genetics* **103**, 338--348 (2018).
14. Sankararaman, S., Sridhar, S., Kimmel, G. & Halperin, E. Estimating Local Ancestry in Admixed Populations. *American Journal of Human Genetics* **82**, 290--303 (2008).
15. Price, A.L. *et al.* Sensitive Detection of Chromosomal Segments of Distinct Ancestry in Admixed Populations. *PLoS Genetics* **5**, e1000519 (2009).
16. Maples, B.K., Gravel, S., Kenny, E.E. & Bustamante, C.D. RFMix: A discriminative modeling approach for rapid and robust local-ancestry inference. *American Journal of Human Genetics* **93**, 278--288 (2013).
17. Kong, A. *et al.* Fine-scale recombination rate differences between sexes, populations and individuals. *Nature* **467**, 1099--1103 (2010).
18. Pratto, F. *et al.* Recombination initiation maps of individual human genomes. *Science* **346**, 1256442 (2014).
19. Bherer, C., Campbell, C.L. & Auton, A. Refined genetic maps reveal sexual dimorphism in human meiotic recombination at multiple scales. *Nature Communications* **8**, 14994 (2017).
20. Matisse, T.C. *et al.* A second-generation combined linkage physical map of the human genome. *Genome Research* **17**, 1783--1786 (2007).
21. Hubert, R., Macdonald, M., Gusella, J. & Arnheim, N. High resolution localization of recombination hot spots using sperm typing. *Nature Genetics* **7**, 420--424 (1994).



22. Jeffreys, A.J., Kauppi, L. & Neumann, R. Intensely punctate meiotic recombination in the class II region of the major histocompatibility complex. *Nature Genetics* **29**, 217--222 (2001).
23. Wang, J., Fan, H.C., Behr, B. & Quake, S.R. Genome-wide single-cell analysis of recombination activity and de novo mutation rates in human sperm. *Cell* **150**, 402--412 (2012).
24. Hinch, A.G. *et al.* The landscape of recombination in African Americans. *Nature* **476**, 170--175 (2011).
25. Wegmann, D. *et al.* Recombination rates in admixed individuals identified by ancestry-based inference. *Nature Genetics* **43**, 847--853 (2011).
26. Chimusa, E.R. *et al.* Genome-wide association study of ancestry-specific TB risk in the South African coloured population. *Human Molecular Genetics* **23**, 796--809 (2014).
27. Xue, J., Lencz, T., Darvasi, A., Pe'er, I. & Carmi, S. The time and place of European admixture in Ashkenazi Jewish history. *PLoS Genetics* **13**, 1--27 (2017).
28. Auton, A. & McVean, G. Recombination rate estimation in the presence of hotspots. *Genome research* **17**, 1219--27 (2007).
29. Chan, A.H., Jenkins, P.A. & Song, Y.S. Genome-Wide Fine-Scale Recombination Rate Variation in *Drosophila melanogaster*. *PLoS Genetics* **8**, e1003090 (2012).
30. Auton, A., Myers, S. & McVean, G. Identifying recombination hotspots using population genetic data. *arXiv preprint arXiv:1403.4264* (2014).
31. Kamm, J.A., Spence, J.P., Chan, J. & Song, Y.S. Two-locus likelihoods under variable population size and fine-scale recombination rate estimation. *Genetics* **203**, 1381--1399 (2016).
32. Spence, J.P. & Song, Y.S. Inference and analysis of population-specific fine-scale recombination maps across 26 diverse human populations. *bioRxiv*, 532168 (2019).
33. Browning, S.R. *et al.* Ancestry-specific recent effective population size in the Americas. *PLoS Genetics* **14**, 1--22 (2018).

34. Taliun, D. *et al.* Sequencing of 53,831 diverse genomes from the NHLBI TOPMed Program. *bioRxiv*, 563866 (2019).
35. International HapMap Consortium. A second generation human haplotype map of over 3.1 million SNPs. *Nature* **449**, 851--861 (2007).
36. 1000 Genomes Project Consortium. A global reference for human genetic variation. *Nature* **526**, 68--74 (2015).
37. Serre, D., Nadon, R. & Hudson, T.J. Large-scale recombination rate patterns are conserved among human populations. *Genome Research* **15**, 1547--1552 (2005).
38. Dapper, A.L. & Payseur, B.A. Connecting theory and data to understand recombination rate evolution. *Philosophical Transactions of the Royal Society B: Biological Sciences* **372**, 20160469 (2017).
39. Kelleher, J., Etheridge, A.M. & McVean, G. Efficient Coalescent Simulation and Genealogical Analysis for Large Sample Sizes. *PLoS Computational Biology* **12**, e1004842 (2016).
40. Manichaikul, A. *et al.* Robust relationship inference in genome-wide association studies. *Bioinformatics* **26**, 2867--2873 (2010).
41. Manichaikul, A. *et al.* Population structure of hispanics in the United States: The multi-Ethnic study of Atherosclerosis. *PLoS Genetics* **8**, e1002640 (2012).
42. Browning, B.L. & Browning, S.R. Improving the accuracy and efficiency of identity-by-descent detection in population data. *Genetics* **194**, 459--471 (2013).
43. Chiang, C.W.K., Ralph, P. & Novembre, J. Conflation of Short Identity-by-Descent Segments Bias Their Inferred Length Distribution. *G3: Genes, Genomes, Genetics* **6**, 1287--1296 (2016).

## FIGURES AND TABLES

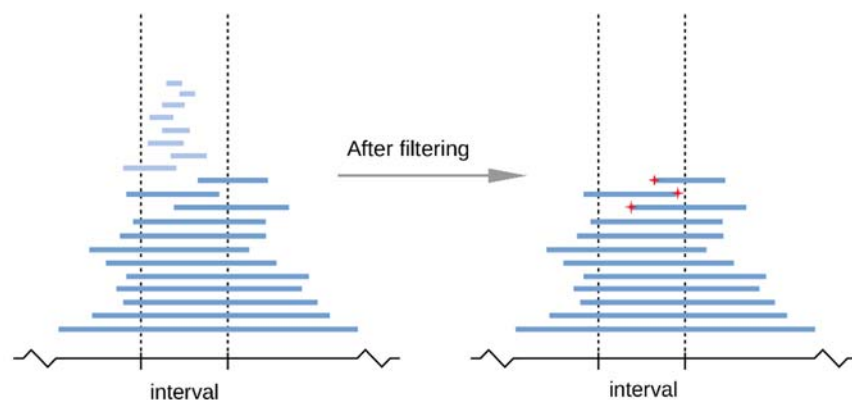

**Figure 1: An illustration of the procedure for enumerating IBD endpoints for recombination rate estimation.** In each iteration, IBD segments with short estimated genetic length are filtered out to achieve the required level of IBD coverage in the target interval, which is delineated with vertical dashed lines. In this example, segments in light blue are filtered out and the three remaining IBD endpoints falling within the interval (marked by red stars) are counted as recombination events corresponding to this interval.

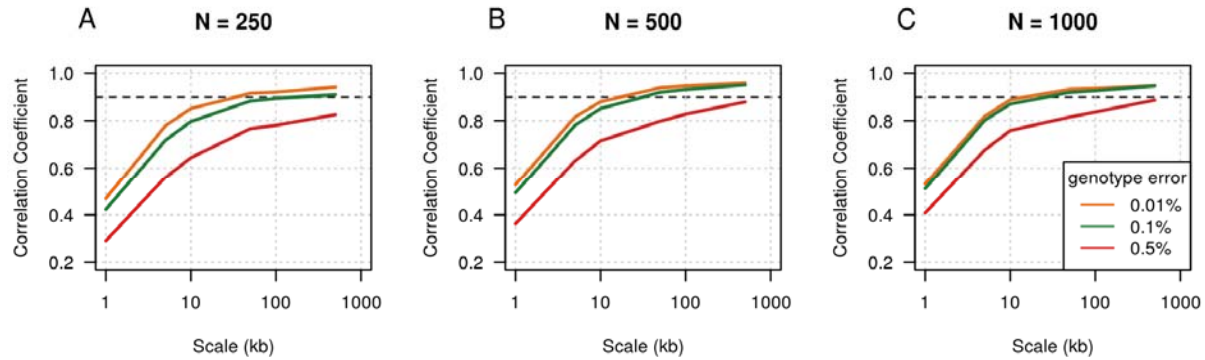

**Figure 2: Pearson correlation coefficients between estimated recombination rates and true rates.** 100 Mb of data were simulated using the Hapmap II combined LD map and a constant effective population size of 10,000. Sample sizes were 250 (panel A), 500 (panel B) or 1000 (panel C). Simulations with different genotype error rates have different colors. The x-axis gives the estimation scale (size of intervals in which recombination rates are estimated and for which correlation coefficients are calculated) on a log scale. The black dashed line shows a correlation coefficient of 0.9 for reference.

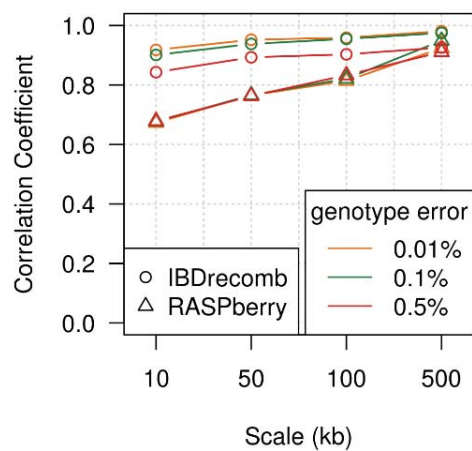

**Figure 3: Pearson Correlation coefficients between estimated recombination rates and true rates.** The results are based on simulations with different levels of added genotype error. Each end of the region was trimmed by 5 Mb before calculating correlation coefficients.

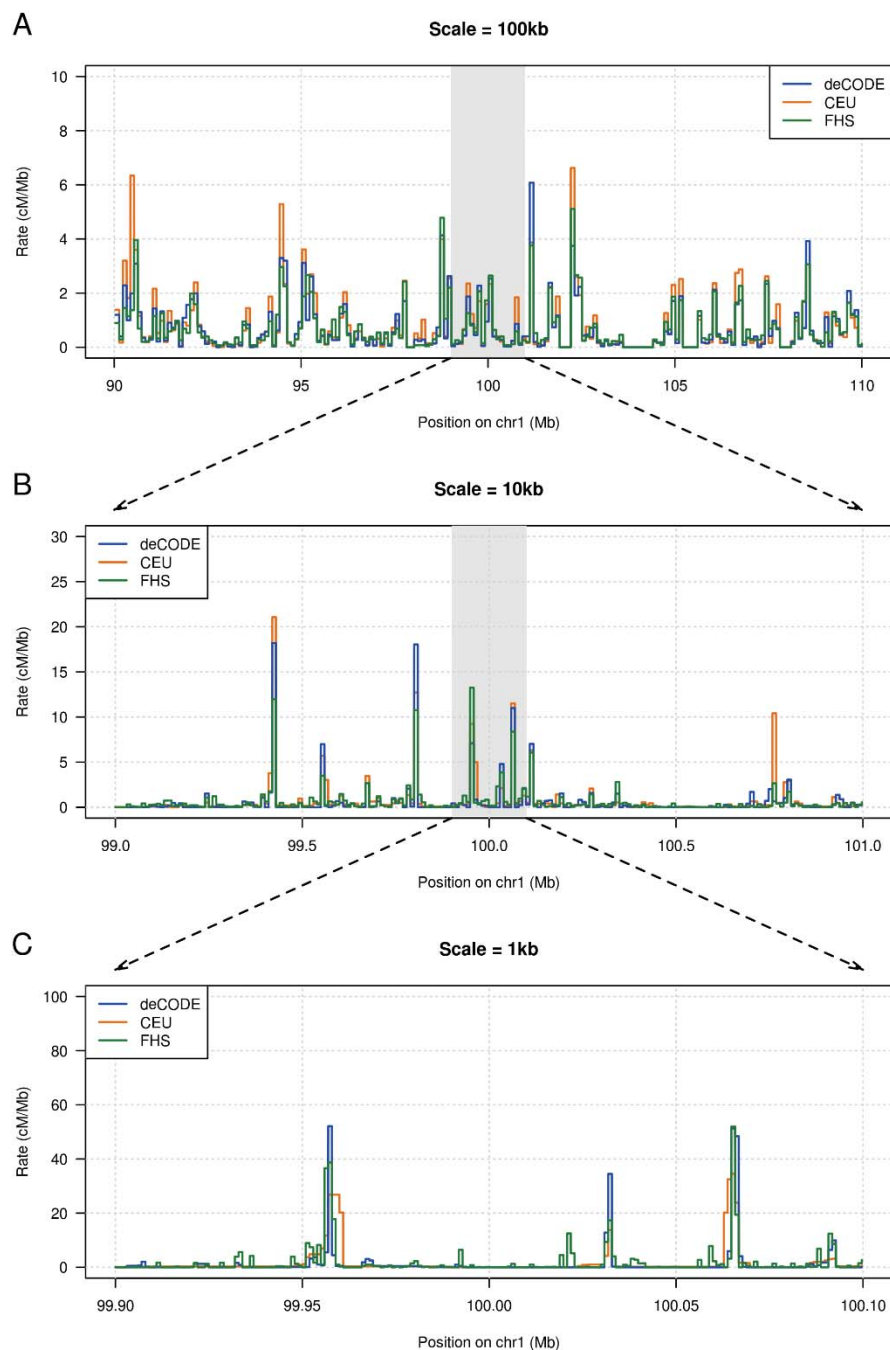

**Figure 4: Estimated European recombination rates around chr1:100Mb.** A) 20Mb at 100kb scale; B) 2Mb at 10kb scale; C) 200kb at 1kb scale. The three maps represent three different methods: pedigree-based (deCODE), LD-based (CEU from the 1000 Genomes Project), and IBD-based (FHS).

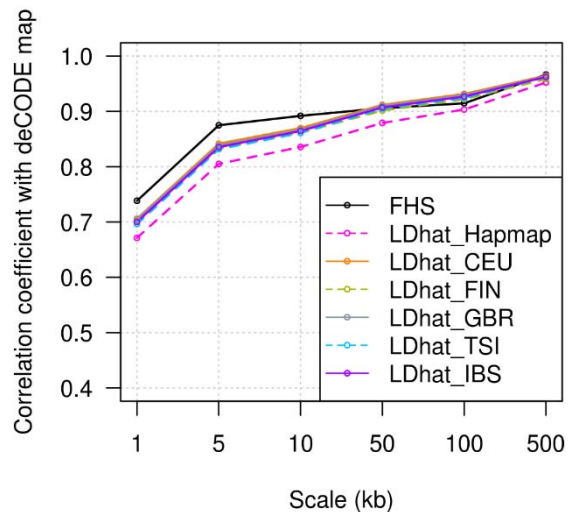

**Figure 5: Pearson correlation coefficients between each map and the deCODE map at different scales.**

FHS is our IBD-based map from the TopMED Framingham Heart Study data. LDhat\_Hapmap is the LD-based Hapmap combined map, while LDhat\_CEU/FIN/GBR/TSI/IBS are the LD-based 1000 Genomes maps for the Utah residents with Northern and Western European ancestry (CEU), Finnish in Finland (FIN), British in England and Scotland (GBR), Toscani in Italia (TSI), and Iberian in Spain (IBS) populations, respectively.

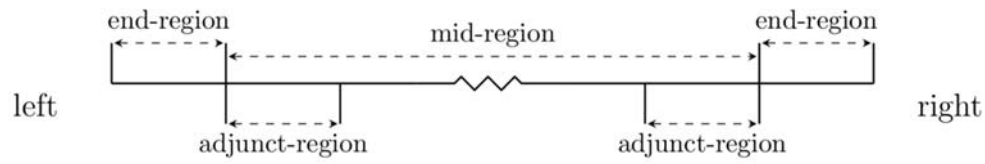

**Figure 6: Chromosome regions for recombination rate estimation.** The end region has genetic length equal to the median genetic length of IBD segments that extend to the chromosome end, and the adjunct-region is next to the end region and has the same genetic length as the end region.



| Scale |         | AA   | JHS  | AfAdm | ASW  | CEU+YRI |
|-------|---------|------|------|-------|------|---------|
| 5kb   | AA      | 1.00 | 0.79 | 0.36  | 0.78 | 0.81    |
|       | JHS     | 0.79 | 1.00 | 0.36  | 0.79 | 0.83    |
|       | AfAdm   | 0.36 | 0.36 | 1.00  | 0.39 | 0.38    |
|       | ASW     | 0.78 | 0.79 | 0.39  | 1.00 | 0.91    |
|       | CEU+YRI | 0.81 | 0.83 | 0.38  | 0.91 | 1.00    |
| 100kb | AA      | 1.00 | 0.90 | 0.81  | 0.91 | 0.93    |
|       | JHS     | 0.90 | 1.00 | 0.79  | 0.87 | 0.89    |
|       | AfAdm   | 0.81 | 0.79 | 1.00  | 0.81 | 0.82    |
|       | ASW     | 0.91 | 0.87 | 0.81  | 1.00 | 0.96    |
|       | CEU+YRI | 0.93 | 0.89 | 0.82  | 0.96 | 1.00    |

**Table 1: Pearson correlation coefficients between estimated recombination rates for five African American genetic maps at different scales.** The CEU+YRI map is the 20%:80% weighted average of the 1000 Genomes Project CEU and YRI maps. Results at other scales from 1kb to 500kb can be found in Table S1.
